# Supplementary material for: Osteopathic Manipulation of the Sphenopalatine Ganglia Versus Sham Manipulation, in Obstructive Sleep Apnoea Syndrom: A Randomised Controlled Trial
Source: MDPI journal article supplement (doi:10.3390/jcm11010099), 2021-12-24
Supplement: s1 [file s1]

CONSORT 2010 Flow Diagram healthy subjects

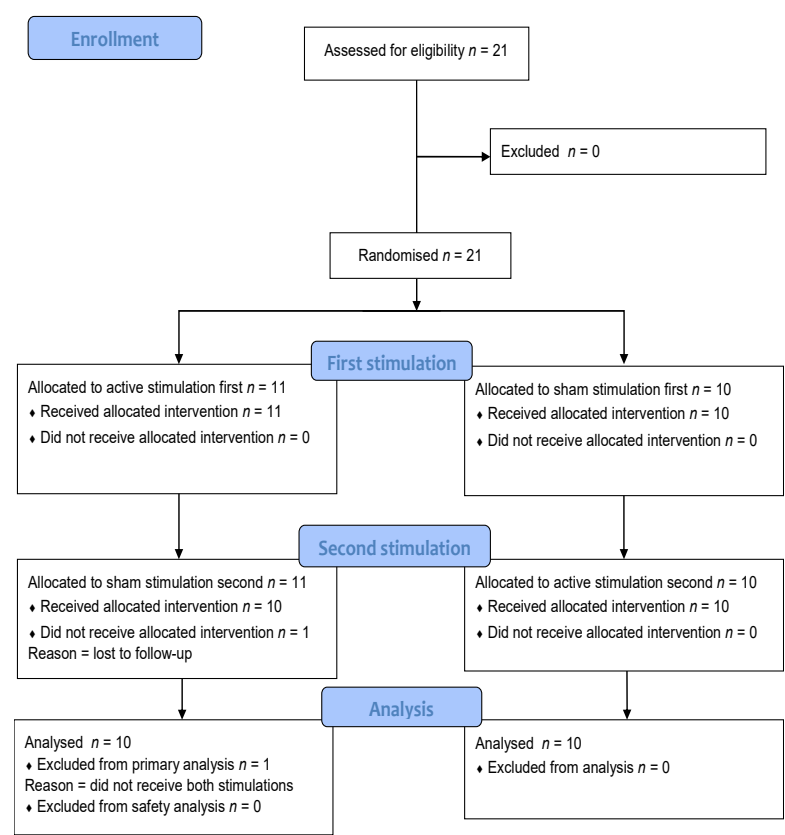

Figure S1. Consort Flow diagram for healthy subjects.

Table S1. Baseline data of healthy subjects before active manual stimulation of the sphenopalatine ganglion and before sham manual stimulation.

| Healthy subjects (n=21) |                     |                     |
|-------------------------|---------------------|---------------------|
| Age (years)             | 25 [22; 31]         |                     |
| Gender (Male/Female; n) | 11/10               |                     |
|                         | Before AM           | Before SM           |
| Weight (kg)             | 67 [59; 76]         | 67 [60; 76]         |
| BMI (kg/m2)             | 22.3 [21.0; 26.9]   | 22.7 [20.9; 26.8]   |
| ESS (/24)               | 7 [5; 10]           | 7 [6; 10]           |
| PNIF (L/min)            | 125 [88; 155]       | 113 [68; 140]       |
| Awake Pcrit*            | -13.5 [-31.0; -8.1] | -17.6 [-21.4; -9.7] |
